# Supplementary material for: Translation Stress Positively Regulates MscL-Dependent Excretion of Cytoplasmic Proteins
Source: PubMed Central journal article supplement (PMC5790912; doi:10.1128/mbio.02118-17), 2018-01-30
Supplement: mbo001183699sf3.pdf [file mbo001183699sf3.pdf]

**A**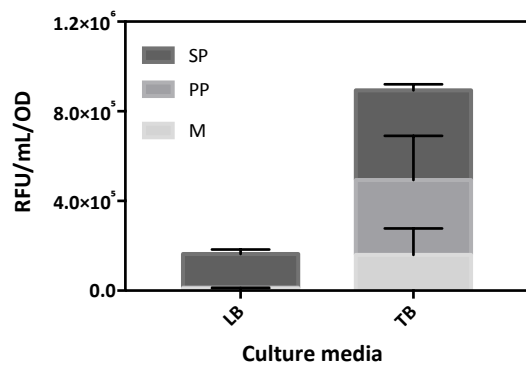**B**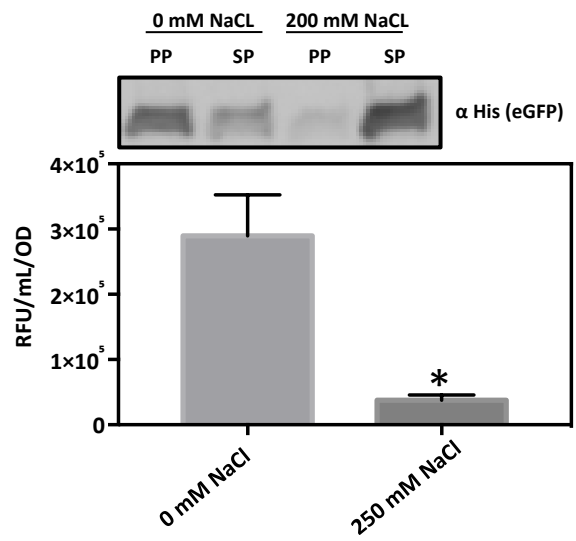**C**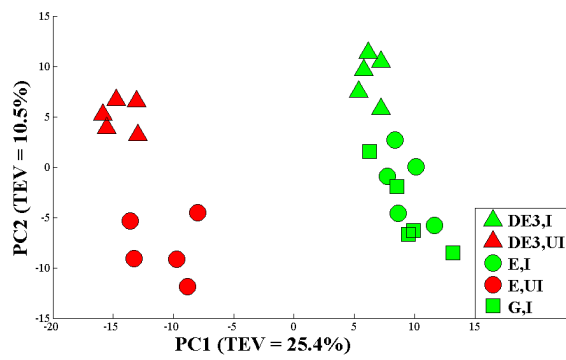**D**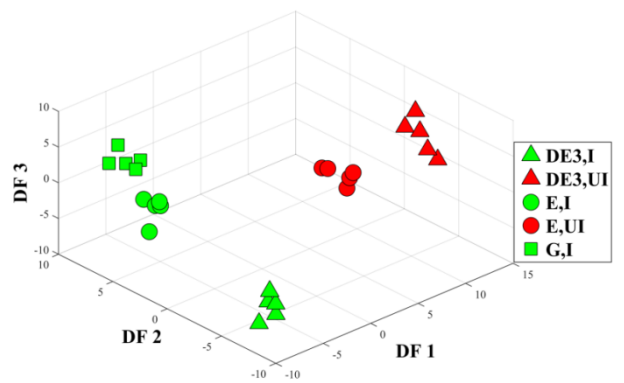**Figure S3**
